# Supplementary material
Source: PubMed Central journal article supplement (PMC3070559)
Supplement: mmc1.pdf [file mmc1.pdf]

## Supplemental figures

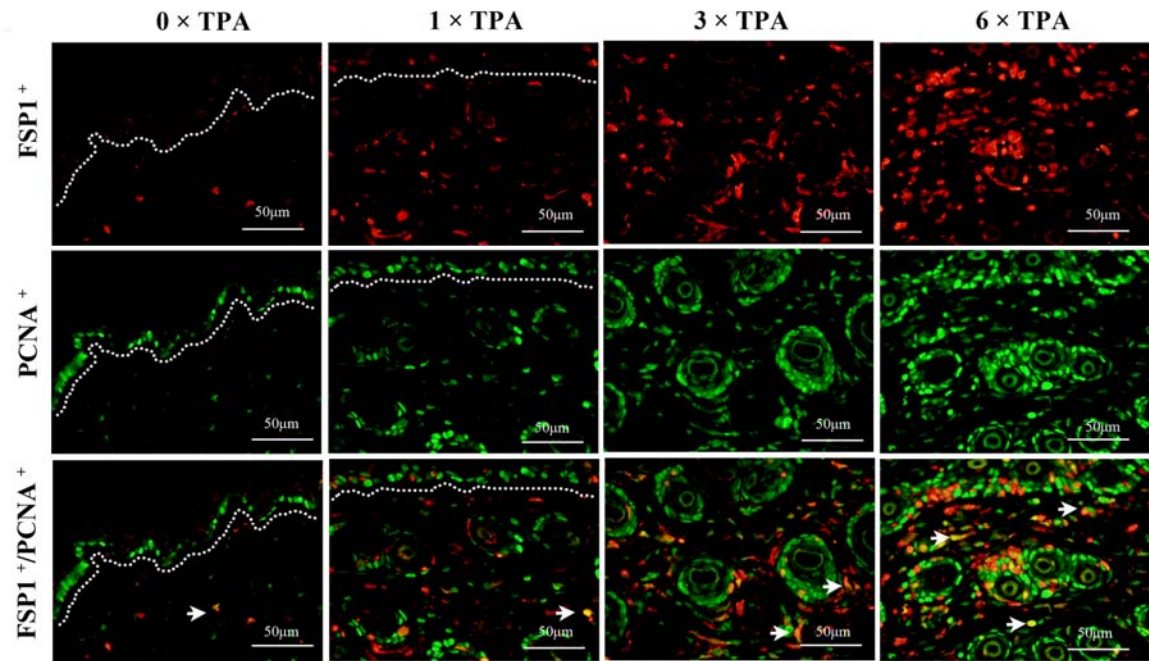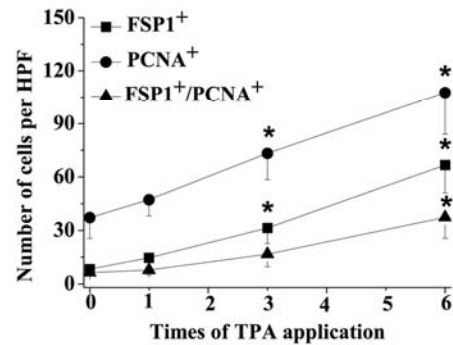

**Supplemental Figure 1. Skin carcinogenesis promoted proliferation of local FSP1<sup>+</sup> fibroblasts.** Groups of BALB/c mice were treated with DMBA and then with TPA, twice a week, as described in Materials and Methods. Twenty-four hours after 0, 1, 3 or 6 times of TPA treatment, skin sections were stained with anti-FSP1 for fibroblasts and with anti-PCNA for cell proliferation. Arrows indicate proliferating fibroblasts that are double positive for both FSP1 and PCNA. Epidermis and dermis boundary is marked by dotted line. Each group contained 4 mice and representative immunofluorescent images are shown.
