# Supplementary material
Source: PubMed Central journal article supplement (PMC3070559)
Supplement: mmc2.pdf [file mmc2.pdf]

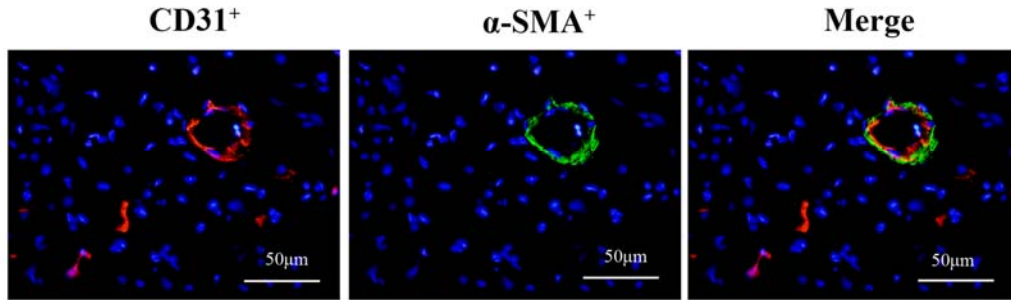

**Supplemental Figure 2.  $\alpha$ -SMA<sup>+</sup> cells distributed mainly around the blood vessels in TPA-treated mouse skin tissues.** FSP-TK mice (n=4) were treated with DMBA and then with TPA as described in Materials and Methods. Twenty-four hours after 3 times of TPA treatment, skin frozen sections were double-stained with anti-CD31 (red) and anti- $\alpha$ -SMA (green). Representative immunofluorescent images are shown.
