# Supplementary material
Source: PubMed Central journal article supplement (PMC3070559)
Supplement: mmc3.pdf [file mmc3.pdf]

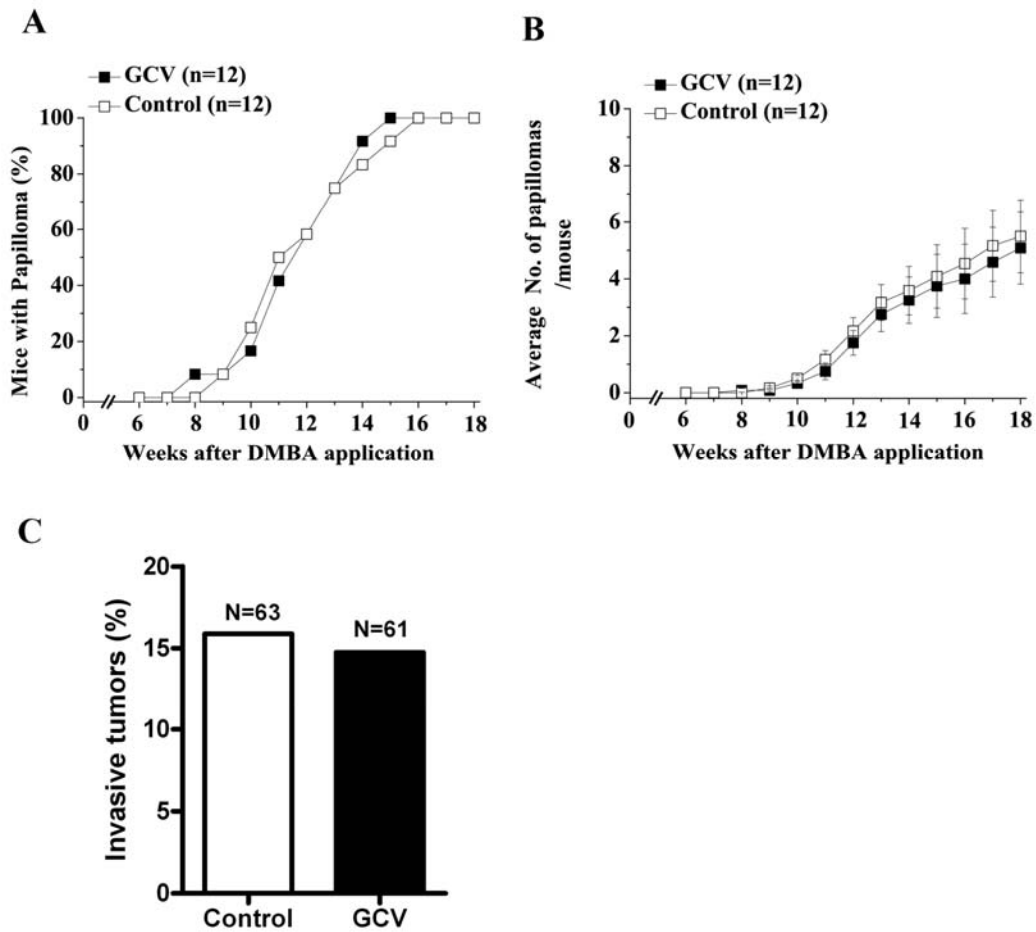

**Supplemental Figure 3.** Tumor development in wild type littermates with GCV treatment was similar to those without GCV treatment. Groups of wild type control littermates were treated with DMBA/TPA and then with either GCV in acetone (■, n = 12) or acetone alone (□, n = 12) for 15 weeks as illustrated in Figure 2A. Shown are percentages of mice with papillomas (**A**) and average numbers of papillomas per mouse (**B**). (**C**) Histopathologic examinations were done on the indicated numbers (N) of papillomas from each group. Invasive squamous cell carcinomas were evaluated as described in Materials & Methods. Shown are percentages of invasive squamous cell carcinomas in the indicated number of papillomas (N) in control littermates at week 25.
