# Supplementary material
Source: PubMed Central journal article supplement (PMC3070559)
Supplement: mmc4.pdf [file mmc4.pdf]

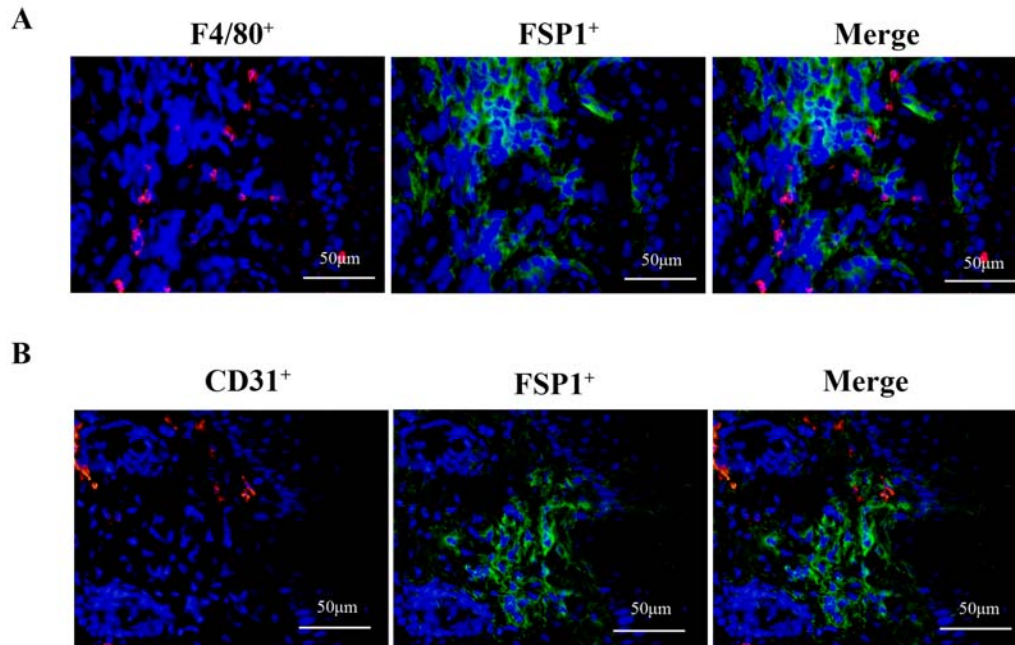

**Supplemental Figure 4. No expression of FSP1 in F4/80<sup>+</sup> macrophages and CD31<sup>+</sup> endothelial cells in TPA-treated mouse skin tissues.** FSP-TK mice (n=4) were treated with DMBA and then with TPA as described in Materials and Methods. Twenty-four hours after 3 times of TPA treatment, skin frozen sections were double-stained with anti-F4/80 for macrophages (red) and anti-FSP1 for fibroblasts (green) (**A**) or with anti-CD31 for endothelial cells (red) and anti-FSP1 for fibroblasts (green) (**B**). Representative immunofluorescent images are shown.
